# Supplementary material for: Enhancement of large magnetoresistances in ruthenocuprates by Ta substitution
Source: Royal Society of Chemistry journal article supplement (doi:10.1039/b617872c), 2007-01-01
Supplement: b617872c.pdf [file b617872c.pdf]

**Supplementary Table 1.** Refined cell parameters and magnetic transition temperatures for the  $\text{Ru}_{1-x}\text{Ta}_x\text{Sr}_2\text{Nd}_{0.95}\text{Y}_{0.15}\text{Ce}_{0.9}\text{Cu}_2\text{O}_{10}$  solid solutions.

| $x$  | $a$ (Å)   | $c$ (Å)    | $T_{\text{Ru}}$ (K) | $T_{\text{Cu}}$ (K) |
|------|-----------|------------|---------------------|---------------------|
| 0.00 | 3.8546(2) | 28.5610(9) | 144                 | 73                  |
| 0.05 | 3.8559(3) | 28.5739(9) | 143                 | 72                  |
| 0.10 | 3.8564(3) | 28.5874(9) | 132                 | 67                  |
| 0.15 | 3.8587(3) | 28.5920(9) | 129                 | 65                  |
| 0.20 | 3.8599(3) | 28.6121(9) | 124                 | 59                  |
| 0.30 | 3.8612(3) | 28.6268(9) | 110                 | 58                  |
| 0.40 | 3.8644(3) | 28.6405(9) | 102                 | 55                  |

**Supplementary Fig. 1** Temperature variation of zero-field cooled magnetic susceptibility

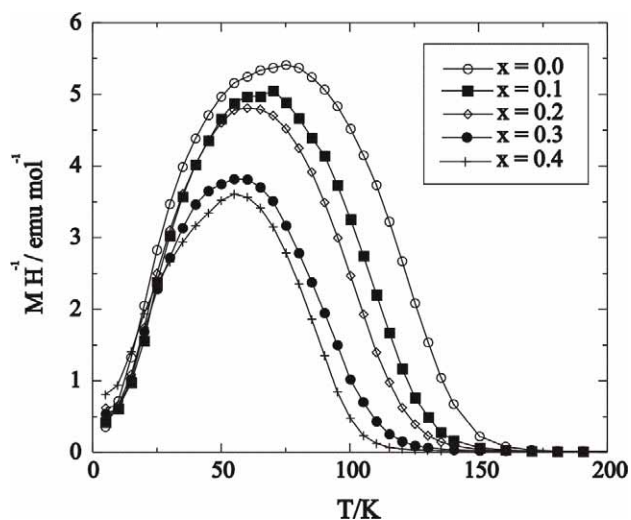

for the  $\text{Ru}_{1-x}\text{Ta}_x\text{Sr}_2\text{Cu}_2\text{Nd}_{0.95}\text{Y}_{0.15}\text{Ce}_{0.9}\text{Cu}_2\text{O}_{10-\delta}$  solid solutions recorded in a 100 Oe field.
